# Supplementary material
Source: PubMed Central journal article supplement (PMC5084088)
Supplement: NIHMS824448-supplement-01.pdf [file NIHMS824448-supplement-01.pdf]

Supplementary Fig. 1.

**BCG vaccination increases interferon-gamma production by monocytes.** Monocytes isolated from naïve (non-exposed) volunteers, before and after (2 weeks and 3 months) vaccination with BCG were stimulated in vitro with sonicated *M. tuberculosis*, heat-killed *S. aureus* and *C. albicans* blastoconidia. INF $\gamma$  production was assessed by ELISA in the supernatants. Data are presented as mean  $\pm$  SEM (n = 9).
